# Supplementary material for: Structured illumination flowmetry
Source: Research Square preprint supplement (doi:10.21203/rs.3.rs-5965275/v1), 2025-03-04
Supplement: Supplementary file 1 [file c132e13d7b6d2e83aba9cc8c.docx]

**Supporting Information**

**Structured illumination flowmetry**

Haichun Liu1, Jerker Widengren1

1Department of Applied Physics, KTH Royal Institute of Technology, S-106 91, Stockholm, Sweden

**Section 1: Er-Ho upconversion emission mechanism**

**
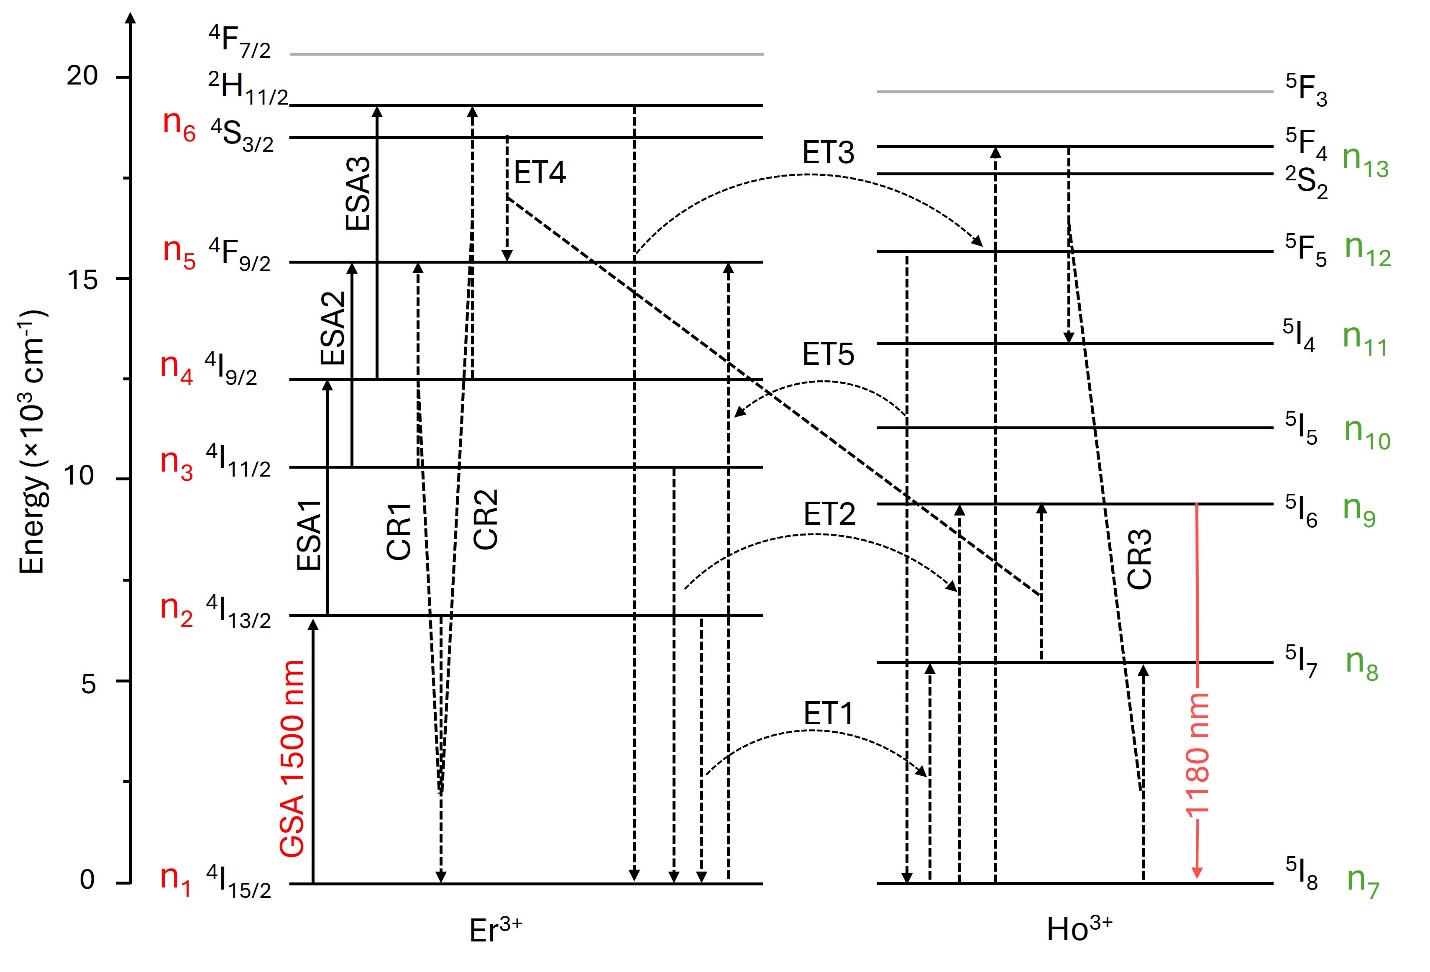
**

Figure **S1**. Model of electronic states and their major transitions in NIR-II NaErF4:Ho@NaYF4 core-shell UCNPs excited at ~1500 nm. GSA, ESA, CR and ET denote ground state absorption, excited state absorption, cross-relaxation and energy transfer, respectively. Emission at ~1180 nm indicated by a red line.

Following the electronic state model for generation of upconversion emission of NaErF4:Ho@NaYF4 core-shell UCNPs (at 1180 nm from Ho3+ ions) under excitation of 1500 nm light, as is depicted in Figure S1, the upconversion processes can be modeled using the following set of rate equations:

Er3+(4I15/2): (S1)

Er3+(4I13/2): (S2)

Er3+(4I11/2): (S3)

Er3+(4I9/2): (S4)

Er3+(4F9/2): (S5)

Er3+(4S3/2 /2H11/2): - (S6)

Ho3+(5I8): -

(S7)

Ho3+(5I7): - (S8)

Ho3+(5I6): (S9)

Ho3+(5I5): (S10)

Ho3+(5I4): (S11)

Ho3+(5F5): (S12)

Ho3+(5F4 /2S2): (S13)

Here, represent the populations of Er3+ ions in the 4I15/2, 4I13/2, 4I11/2, 4I9/2, 4F9/2, 2H11/2/4S3/2 states, respectively, and denote the populations of Ho3+ ions in the 5I8, 5I7, 5I6, 5I5, 5I4, 5F5, 5F4/2S2 states, respectively. represent the radiative decay lifetimes of the 4I13/2, 4I11/2, 4I9/2, 4F9/2, 2H11/2/4S3/2 states of Er3+ and the 5I7, 5I6, 5I5, 5I4, 5F5, 5F4/2S2 states of Ho3+, respectively. represents the non-radiative decay rates of the 4I11/2, 4I9/2, 4F9/2, 2H11/2/4S3/2 states of Er3+ and the 5I6, 5I5, 5I4, 5F5, 5F4/2S2 states of Ho3+, respectively. denote the coefficients of the interionic energy transfer processes: 4I13/2 (Er3+) + 5I8 (Ho3+)→4I15/2 (Er3+) + 5I7 (Ho3+), 4I11/2 (Er3+) + 5I8 (Ho3+)→4I15/2 (Er3+) + 5I6 (Ho3+), 2H11/2/4S3/2 (Er3+) + 5I8 (Ho3+)→4I15/2 (Er3+) + 5F4/2S2 (Ho3+), 2H11/2/4S3/2 (Er3+) + 5I7 (Ho3+)→4F9/2 (Er3+) + 5I6 (Ho3+), 5I8 (Ho3+) + 4F9/2 (Er3+)→5F7 (Ho3+) + 4I15/2 (Er3+), respectively. denotes the absorption cross-section for the ground-state absorption process of Er3+: 4I15/2→4I13/2 at 1500 nm. is the excitation intensity function at 1500 nm. is the Planck’s constant. is the frequency of excitation photon at 1500 nm. , , and denote the absorption cross-sections for the excited state absorption processes 4I13/2→4I9/2, 4I11/2→4F9/2, 4I9/2→2H11/2/4S3/2, respectively, of Er3+ at ~1500 nm. denote the coefficients of the cross-relaxation processes: 4I13/2 (Er3+) + 4I11/2 (Er3+)→4I15/2(Er3+) + 4F9/2 (Er3+), 4I13/2 (Er3+) + 4I9/2 (Er3+)→4I15/2(Er3+) + 2H11/2/4S3/2 (Er3+), 5I8 (Ho3+) + 5F4/2S2 (Ho3+)→5I4 (Ho3+) + 5I7 (Ho3+), respectively.

**Table S1** Values of key photophysical parameters used in the simulations of the Er3+/Ho3+ co-doped UCNP photodynamics

| **(cm2)** | | **(cm2)** | | **(cm2)** | | **(cm2)** | **(cm3s-1)** | **(cm3s-1)** | **(cm3s-1)** | **(cm3s-1)** | **(cm3s-1)** |
| --- | --- | --- | --- | --- | --- | --- | --- | --- | --- | --- | --- |
| 8×10-21 | 8×10-20 | | 4×10-20 | | 8×10-20 | | 1.8×10-16 | 1.8×10-16 | 1.8×10-16 | 1.8×10-16 | 1.8×10-16 |
| **β3(s-1)** | **β4(s-1)** | | **β5(s-1)** | | **β6(s-1)** | | **β9(s-1)** | **β10(s-1)** | **β11(s-1)** | **β12(s-1)** | **β13(s-1)** |
| 5×102 | 5×104 | | 2×104 | | 8×103 | | 8×103 | 1×104 | 2×104 | 3×104 | 3×104 |
| **τ2(μs)** | **τ3(μs)** | | **τ4(μs)** | | **τ5(μs)** | | **τ6(μs)** | **τ8(μs)** | **τ9(μs)** | **τ10(μs)** | **τ11(μs)** |
| 7.5×103 | 1×103 | | 200 | | 200 | | 100 | 7.5×103 | 1×103 | 50 | 50 |
| **τ12(μs)** | **τ13(μs)** | | **c1(cm3s-1)** | | **c2(cm3s-1)** | | **c3(cm3s-1)** |  |  |  |  |
| 150 | 100 | | 3×10-18 | | 3×10-18 | | 3×10-18 |  |  |  |  |


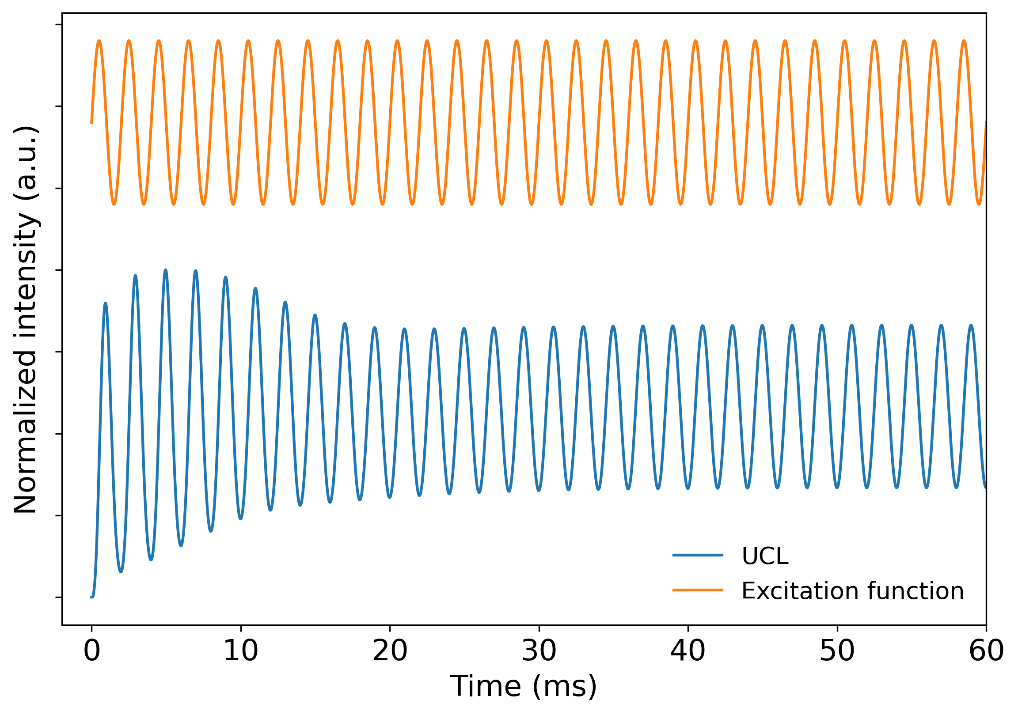


Figure S2 Temporal UCL response (from a NaErF4:Ho@NaYF4 core-shell UCNP) to a sinusoidally modulated excitation intensity.


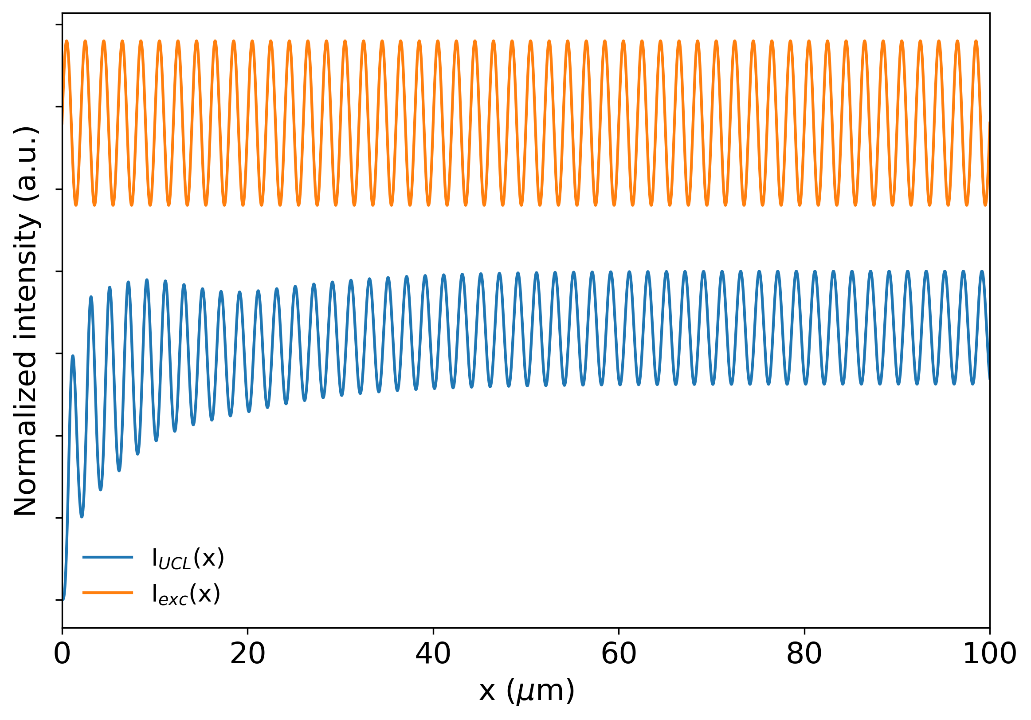


Figure S3 Excitation pattern, Iexc(*x*) (orange), providing a structured illumination, and the resulting UCL pattern, IUCL(x) (blue), from UCNPs (NaErF4:Ho@NaYF4 core-shell UCNPs) as they flow along a channel at a constant velocity (). A phase shift between Iexc(*x*) and IUCL(*x*) can be clearly noticed.
